# Supplementary material
Source: publisher figshare collection journal article supplement (https://frontiersin.figshare.com/ndownloader/files/14081246)
Supplement: Supplementary file [file 14081246]

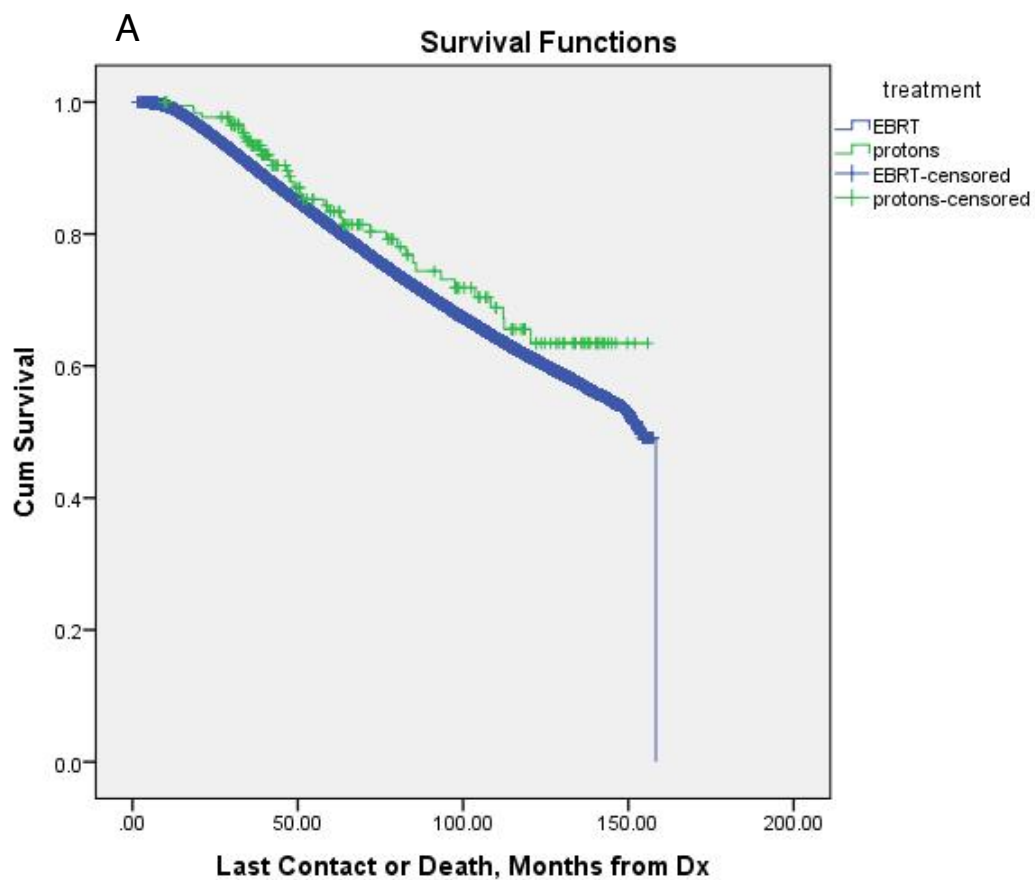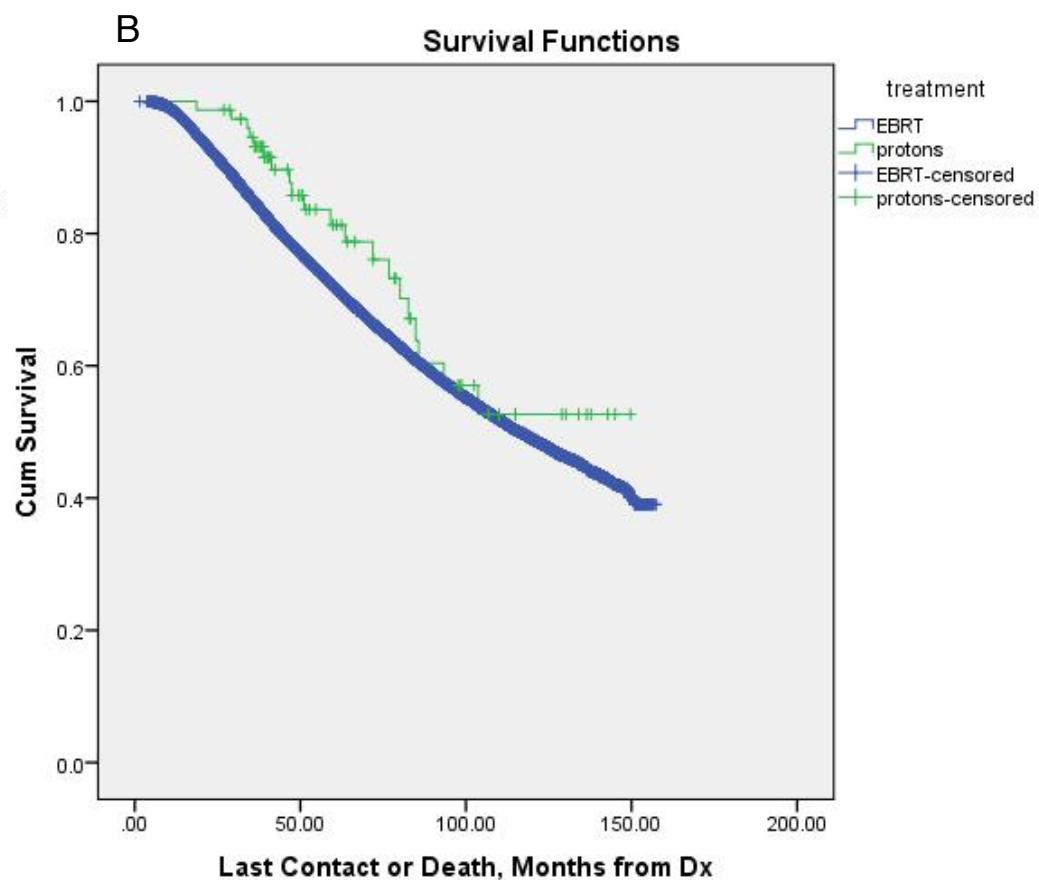

**Supplemental Figure 4:** Overall Survival with Proton vs. Non-Proton EBRT in Pathologically Node Positive (A) and Pathologically N2-N3 Disease (B) Cohorts

Pathologically Node Positive Cohort

5-year Overall Survival

- Non-Proton (EBRT): 81.2%
- Protons: 83.4%

p-value=0.169

Pathologically N2-N3 disease Cohort

5-year Overall Survival

- Non-Proton (EBRT): 72.0%
- Protons 81.3%

p-value=0.131
